# Supplementary material for: Inhalable Polymeric Nanoparticles for Pulmonary Delivery of Antimicrobial Peptide SET-M33: Antibacterial Activity and Toxicity In Vitro and In Vivo
Source: MDPI journal article supplement (doi:10.3390/pharmaceutics15010003), 2022-12-20
Supplement: s1 [file s1]

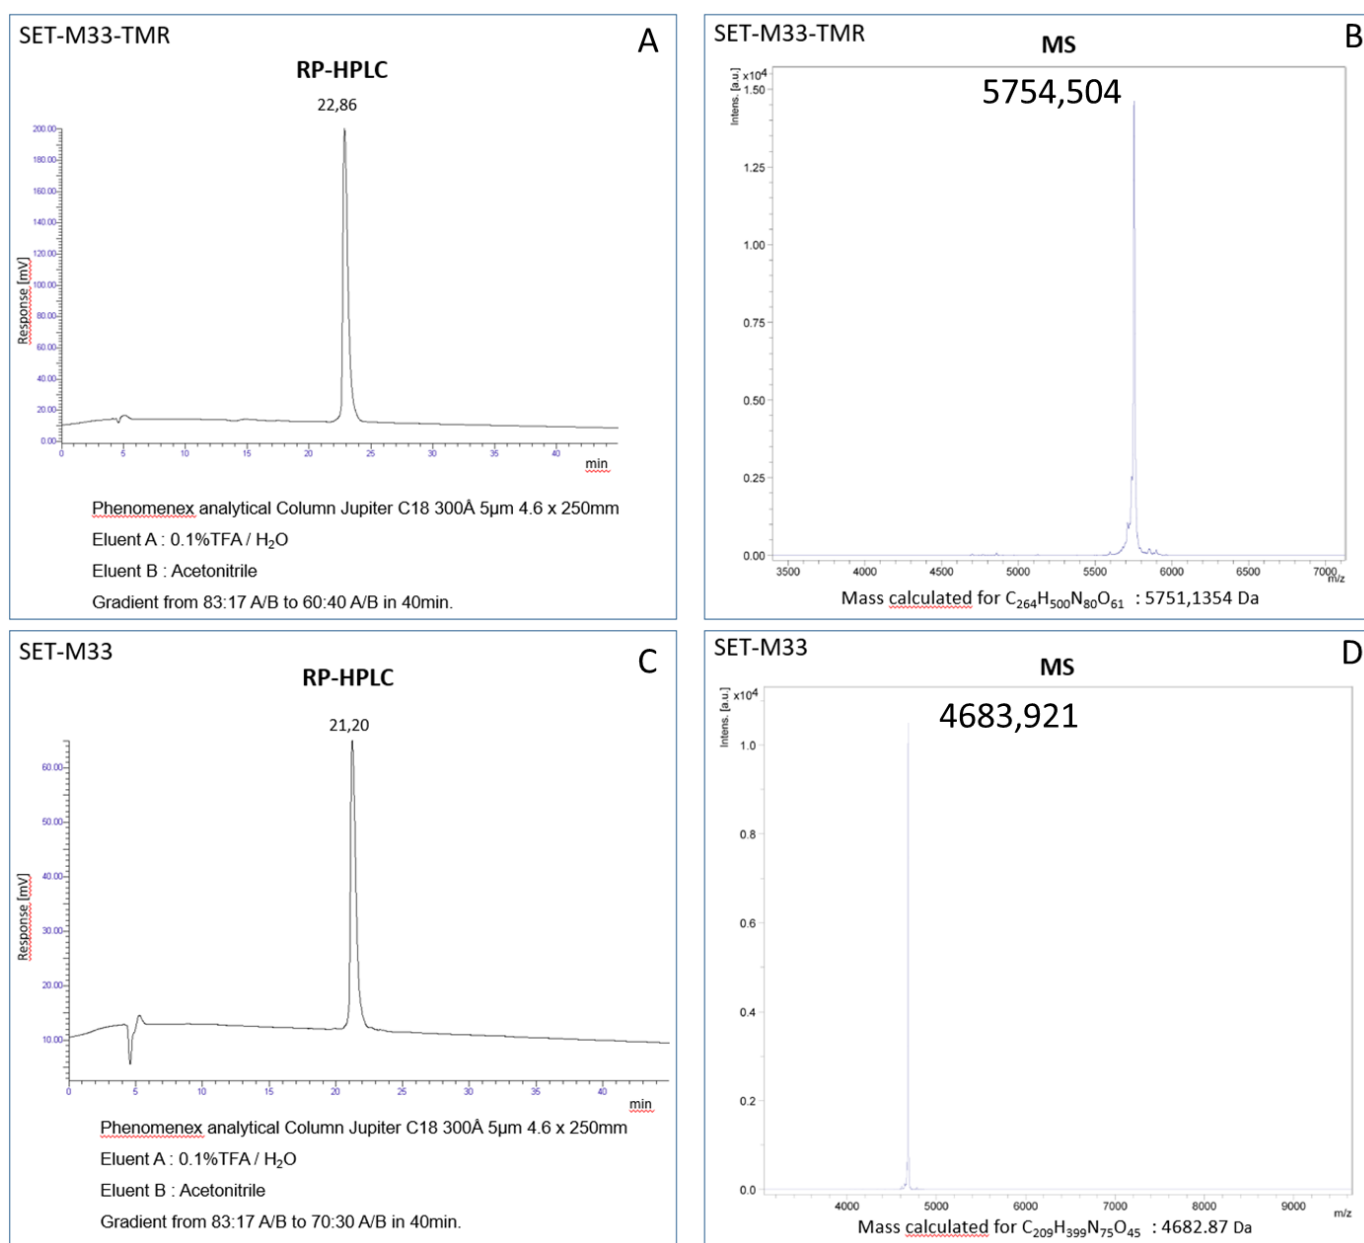

**Figure S1.** HPLC and Mass Spectrometry (MS) profiles of SET-M33 conjugated with tetramethyl-rhodamine (SET-M33-TMR) and free SET-M33. A and C, reverse phase HPLC profiles of SET-M33-TMR (A) and SET-M33 (C) with test method (below) and retention times (above the peaks). B and D, MS profiles of SET-M33-TMR (B) and SET-M33 (D) with the indication of revealed (above the main peak) and calculated MW (below the graph).
